# Supplementary material for: The Distribution and Sustainable Utilization of Buckwheat Resources under Climate Change in China
Source: Plants (Basel). 2021 Sep 30;10(10):2081. doi: 10.3390/plants10102081 (PMC8538749; doi:10.3390/plants10102081)
Supplement: Supplementary file 1 [file plants-10-02081-s001.zip › plants-1353770-supplementary.pdf]

**Table S1. The percentage of wild buckwheat species potentially suitable area in China**

| Potentially suitable area | Current | 2070s   |         |         |
|---------------------------|---------|---------|---------|---------|
|                           |         | RCP 2.6 | RCP 4.5 | RCP 8.5 |
| Unsuitable area           | 55.44%  | 63.27%  | 57.73%  | 59.88%  |
| Lowly suitable area       | 23.86%  | 20.27%  | 22.95%  | 22.90%  |
| Moderately suitable area  | 12.63%  | 8.96%   | 11.25%  | 8.76%   |
| Highly suitable area      | 8.07%   | 7.50%   | 8.08%   | 8.47%   |
| More suitable area        | 20.70%  | 16.46%  | 19.32%  | 17.22%  |

**Note:** the percentage = the potential area in four classes / the total area of China

**Table S2. The percentage of cultivated buckwheat potentially suitable area in China**

| Potentially suitable area | Current | 2070s   |         |         |
|---------------------------|---------|---------|---------|---------|
|                           |         | RCP 2.6 | RCP 4.5 | RCP 8.5 |
| Unsuitable area           | 13.98%  | 9.30%   | 9.58%   | 7.34%   |
| Lowly suitable area       | 32.10%  | 21.67%  | 23.22%  | 21.38%  |
| Moderately suitable area  | 24.57%  | 35.21%  | 33.03%  | 33.78%  |
| Highly suitable area      | 29.35%  | 33.83%  | 34.16%  | 37.50%  |
| More suitable area        | 53.91%  | 69.03%  | 67.20%  | 71.28%  |

**Note:** the percentage = the potential area in four classes / the total area of China

**Table S3. The collection locations of 19 wild buckwheat species**

| <b>Scientific Name</b>    | <b>Location</b>                                                |
|---------------------------|----------------------------------------------------------------|
| <i>F. qiangcai</i>        | Tibetan Qiang Autonomous Prefecture of Ngawa, Sichuan province |
| <i>F. macrocarpum</i>     | Tibetan Qiang Autonomous Prefecture of Ngawa, Sichuan province |
| <i>F. rubifolium</i>      | Tibetan Qiang Autonomous Prefecture of Ngawa, Sichuan province |
| <i>F. gracilipes</i>      | Liangshan Yi Autonomous Prefecture, Sichuan province           |
| <i>F. pugense</i>         | Liangshan Yi Autonomous Prefecture, Sichuan province           |
| <i>F. luojishanense</i>   | Liangshan Yi Autonomous Prefecture, Sichuan province           |
| <i>F. jinshaense</i>      | Lijiang city, Yunnan province                                  |
| <i>F. capillatum</i>      | Lijiang city, Yunnan province                                  |
| <i>F. gracilipedoides</i> | Lijiang city, Yunnan province                                  |
| <i>F. gilesii</i>         | Diqing Tibetan Autonomous Prefecture, Yunnan province          |
| <i>F. urophyllum</i>      | Lijiang city, Yunnan province                                  |
| <i>F. lineare</i>         | Dali city, Yunnan province                                     |
| <i>F. statice</i>         | Honghe Hani and Yi Autonomous Prefecture, Yunnan province      |
| <i>F. caudatum</i>        | Lijiang city, Yunnan province                                  |
| <i>F. crispatofolium</i>  | Liangshan Yi Autonomous Prefecture, Sichuan province           |
| <i>F. homotropicum</i>    | Lijiang city, Yunnan province                                  |
| <i>F. cymosum</i>         | Liangshan Yi Autonomous Prefecture, Sichuan province           |
| <i>F. leptopodum</i>      | Ya'an city, Sichuan province                                   |
| <i>F. hailuogouense</i>   | Ganzi Tibetan Autonomous Prefecture, Sichuan province          |

**Table S4. The meaning of 19 bioclimatic variables**

| Bioclimatic variables |                                                                 | Meaning |  | Bioclimatic variables |                                                           | Meaning |  |
|-----------------------|-----------------------------------------------------------------|---------|--|-----------------------|-----------------------------------------------------------|---------|--|
| Bio1                  | Annual Mean Temperature [°C]                                    |         |  | Bio11                 | Mean Temperature of Coldest Quarter [°C]                  |         |  |
| Bio2                  | Mean Diurnal Range (Mean of monthly (max temp - min temp)) [°C] |         |  | Bio12                 | Annual Precipitation [mm]                                 |         |  |
| Bio3                  | Isothermality (Bio2/Bio7) (* 100) [°C]                          |         |  | Bio13                 | Precipitation of Wettest Month [mm]                       |         |  |
| Bio4                  | Temperature Seasonality (standard deviation *100) [°C]          |         |  | Bio14                 | Precipitation of Driest Month [mm]                        |         |  |
| Bio5                  | Max Temperature of Warmest Month [°C]                           |         |  | Bio15                 | Precipitation Seasonality (Coefficient of Variation) [mm] |         |  |
| Bio6                  | Min Temperature of Coldest Month [°C]                           |         |  | Bio16                 | Precipitation of Wettest Quarter [mm]                     |         |  |
| Bio7                  | Temperature Annual Range (Bio5-Bio6) [°C]                       |         |  | Bio17                 | Precipitation of Driest Quarter [mm]                      |         |  |
| Bio8                  | Mean Temperature of Wettest Quarter [°C]                        |         |  | Bio18                 | Precipitation of Warmest Quarter [mm]                     |         |  |
| Bio9                  | Mean Temperature of Driest Quarter [°C]                         |         |  | Bio19                 | Precipitation of Coldest Quarter [mm]                     |         |  |
| Bio10                 | Mean Temperature of Warmest Quarter [°C]                        |         |  |                       |                                                           |         |  |

(a) current

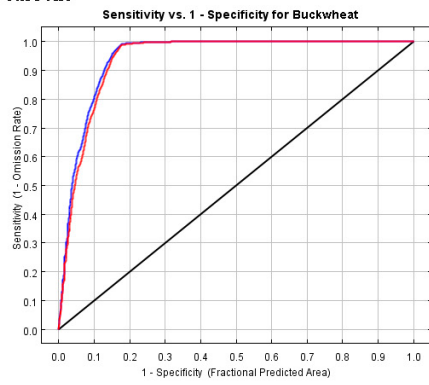

(b) RCP 2.6

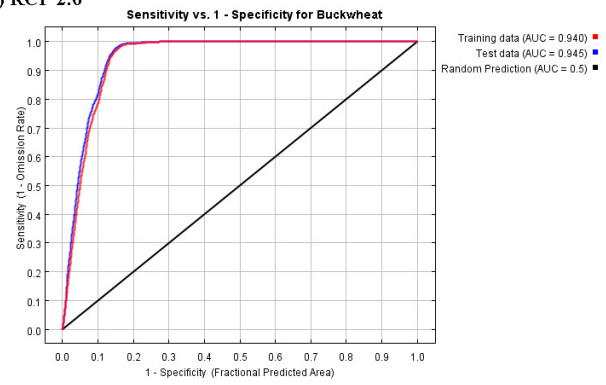

(c) RCP 4.5

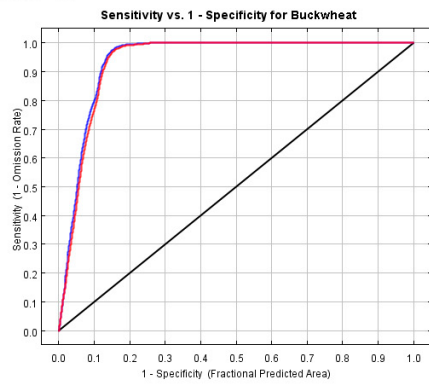

(d) RCP 8.5

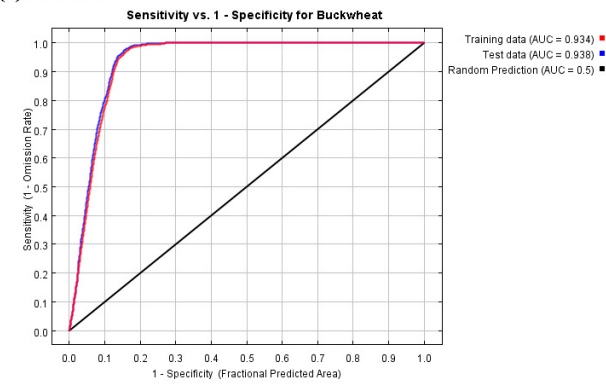

**Figure S1.** The results of AUC of wild buckwheat in MaxEnt model

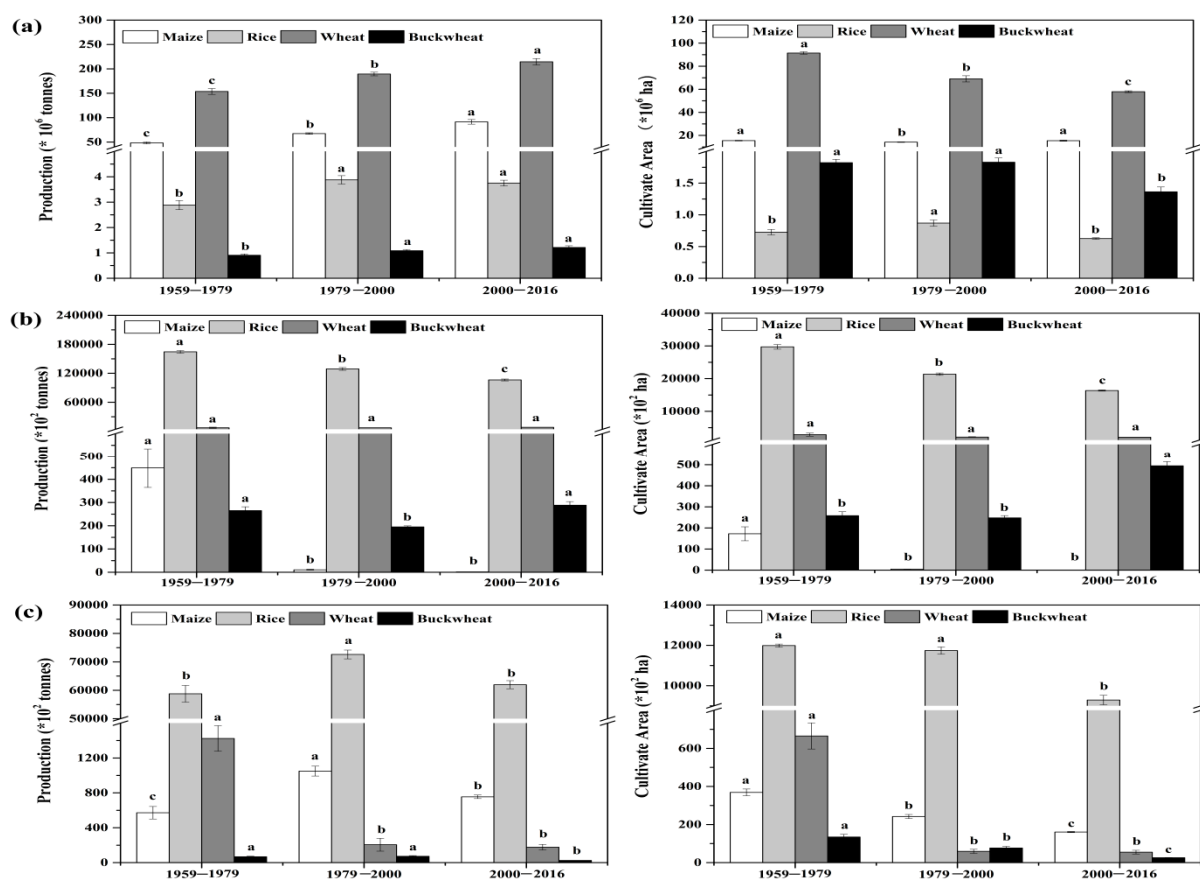

**Figure S2.** The development progress of buckwheat cultivation in Europe, Japan and South Korea. (a) Europe, (b) Japan, (c) South Korea. Values are means  $\pm$  SE, different lowercase letters in each crop indicate the significant differences between different patterns (ANOVA followed by Duncan test,  $p < 0.05$ ).
